# Supplementary material for: A mathematical landmark-based method for measuring worn molars in hominoid systematics
Source: PeerJ. 2019 May 23;7:e6990. doi: 10.7717/peerj.6990 (PMC6535218; doi:10.7717/peerj.6990)
Supplement: File S1 [file peerj-07-6990-s001.xlsx]

## Sheet: Sheet1
RAW INPUTS - LANDMARK COORDINATES OF 110 SPECIMENS (29 LANDMARKS PER SPECIMEN)
MORPHOLOGIKA SCRIPT - COLUMNS A AND B. 29 landmarks described from line 234, coordinates of all landmarks start at line 234
[individuals]
110
[landmarks]
29
[Dimensions]
2
[names]		Spec#		Museum/Catalogue	Species/subspecies	Population/area	Sex
Gbb180+1911+F		1		RG 2258	G. b. beringei	Virunga	F
Gbb188+1911+F		2		RG 8607	G. b. beringei	Virunga	F
Gbb196+1911+F		3		USNM 396935	G. b. beringei	Virunga	F
Gbb202+1911+F		4		USNM 545026	G. b. beringei	Virunga	F
Gbb179+1911+M		5		RG 2257	G. b. beringei	Virunga	M
Gbb194+1911+M		6		USNM 395636	G. b. beringei	Virunga	M
Gbb208+1911+M		7		USNM 545032	G. b. beringei	Virunga	M
Gbb210+1911+M		8		USNM 545036	G. b. beringei	Virunga	M
Gbb234+A12+F		9		BMNH ZD 1922.2.10.2	G. b. beringei	Kayonza	F
Gbb233+A12+M		10		BMNH ZD 1922.2.10.1	G. b. beringei	Kayonza	M
Gbg257+1608+F		11		RG 27755	G. b. graueri	Utu	F
Gbg267+1608+F		12		RG 86044M20	G. b. graueri	Utu	F
Gbg264+1608+M		13		RG 86044M15	G. b. graueri	Utu	M
Gbg266+1608+M		14		RG 86044M18	G. b. graueri	Utu	M
Gbg243+1709+F		15		RG 833	G. b. graueri	Mweng-Fizi	F
Gbg242+1709+M		16		RG 804	G. b. graueri	Mweng-Fizi	M
Gbg273+1810+F		17		RG 15352	G. b. graueri	Tshiaberimu	F
Gbg277+1810+F		18		RG 15356	G. b. graueri	Tshiaberimu	F
Gbg284+1810+M		19		RG 22903	G. b. graueri	Tshiaberimu	M
Gbg285+1810+M		20		RG 22905	G. b. graueri	Tshiaberimu	M
Ggd155+0303+F		21		ZMB 14647	G. g. gorilla	Coastal Cameroon	F
Ggd347+0202+M		22		BMNH ZD.1939.908(A)	G. g. gorilla	Coastal Cameroon	M
Ggd345+0705+M		23		ZMB 83581	G. g. gorilla	Coastal Cameroon	M
Ggg330+0202+F		24		Z 12499	G. g. gorilla	Coastal Gabon	F
Ggg036+0202+M		25		Z 7510	G. g. gorilla	Coastal Gabon	F
Ggg174+0303+F		26		ZMB 6965	G. g. gorilla	Coastal Gabon	F
Ggg309+0303+F		27		Z 7666	G. g. gorilla	Coastal Gabon	M
Ggg162+0303+M		28		ZMB 31275	G. g. gorilla	Coastal Gabon	M
Ggg307+0303+M		29		PCM F.C.120	G. g. gorilla	Southern Gabon, Congo	F
Ggg106+0604+F		30		BMNH ZD.1986.534	G. g. gorilla	Southern Gabon, Congo	M
Ggg123+0604+M		31		USNM 252579	G. g. gorilla	Sangha River	F
Ggg214+0705+F		32		RG 77032M16	G. g. gorilla	Sangha River	M
Ggg300+0705+M		33		ZMB 83537	G. g. gorilla	Sangha River	M
Ggg052+1006+F		34		PCM M.729	G. g. gorilla	Upper reaches of Sangha and Sanaga Rivers	F
Ggg075+1006+F		35		PCM M.799	G. g. gorilla	Upper reaches of Sangha and Sanaga Rivers	F
Ggg086+1006+M		36		PCM M.464	G. g. gorilla	Upper reaches of Sangha and Sanaga Rivers	M
Ggg087+1006+M		37		PCM M.462	G. g. gorilla	Upper reaches of Sangha and Sanaga Rivers	M
Ggg014+1307+F		38		MCZ 37264	G. g. gorilla	Inland Cameroon	F
Ggg100+1407+F		39		PCM CAM.I.149	G. g. gorilla	Inland Cameroon	F
Ggg022+1407+M		40		MCZ 23160	G. g. gorilla	Inland Cameroon	M
Ptv159+0101+F		41		RG 31490	P. t. verus	Between Gambia and Cavally	F
Ptv202+0101+F		42		USNM 282763	P. t. verus	Between Gambia and Cavally	F
Ptv223+0101+F		43		PM N/6908	P. t. verus	Between Gambia and Cavally	F
Ptv228+0101+F		44		PM N/6918	P. t. verus	Between Gambia and Cavally	F
Ptv230+0101+M		45		PM N/6923	P. t. verus	Between Gambia and Cavally	M
Ptv263+0101+M		46		PM N/7257	P. t. verus	Between Gambia and Cavally	M
Ptv266+0101+M		47		PM N/7271	P. t. verus	Between Gambia and Cavally	M
Ptv290+0101+M		48		PM N/7565	P. t. verus	Between Gambia and Cavally	M
Ptv299+0102+F		49		AMNH 89351	P. t. verus	Between Cavally and Volta	F
Ptv298+0102+M		50		AMNH 89406	P. t. verus	Between Cavally and Volta	M
Ptt089+0205+F		51		Z 7688	P. t. troglodytes	South Sanaga River	F
Ptt012+0205+M		52		PCM CAM.II.62	P. t. troglodytes	South Sanaga River	M
Ptt005+0206+F		53		PCM M.105	P. t. troglodytes	Sanaga River, inland of coast	F
Ptt041+0206+F		54		PCM M.184	P. t. troglodytes	Sanaga River, inland of coast	F
Ptt050+0206+F		55		PCM M.655	P. t. troglodytes	Sanaga River, inland of coast	F
Ptt022+0206+M		56		PCM M.707	P. t. troglodytes	Sanaga River, inland of coast	M
Ptt060+0206+M		57		PCM CAM.I.219	P. t. troglodytes	Sanaga River, inland of coast	M
Ptt213+0206+M		58		MCZ 20041	P. t. troglodytes	Sanaga River, inland of coast	M
Ptt144+0208+F		59		RG 178	P. t. troglodytes	Southern Gabon	F
Ptt373+0208+M		60		ZMB 27049	P. t. troglodytes	Southern Gabon	M
Pts166+0309+M		61		RG 1942	P. t. schweinfurthii	Between Ubangi and Congo-Lisala	M
Pts170+0310+F		62		RG 4188	P. t. schweinfurthii	Uele River	F
Pts185+0310+F		63		RG 10800	P. t. schweinfurthii	Uele River	F
Pts174+0310+M		64		RG 8369	P. t. schweinfurthii	Uele River	M
Pts327+0310+M		65		RG 10732	P. t. schweinfurthii	Uele River	M
Pts334+0311+F		66		RG 83006M26	P. t. schweinfurthii	Kisangani district	F
Pts179+0311+M		67		RG 9576	P. t. schweinfurthii	Kisangani district	M
Pts308+0312+M		68		BMNH ZD 1922.12.19.2	P. t. schweinfurthii	Lake Albert to north of Lake Tanganyika	M
Pts370+0312+M		69		ZMB 31647	P. t. schweinfurthii	Lake Albert to north of Lake Tanganyika	M
Pts189+0313+F		70		RG 12090	P. t. schweinfurthii	Lake Kivu and Lake Tanganyika	F
Ppan101+0414+F		71		RG 9388	P. paniscus	Between Congo and Lukenie	F
Ppan103+0414+F		72		RG 11352	P. paniscus	Between Congo and Lukenie	F
Ppan105+0414+F		73		RG 13201	P. paniscus	Between Congo and Lukenie	F
Ppan112+0414+M		74		RG 23509	P. paniscus	Between Congo and Lukenie	M
Ppan127+0414+M		75		RG 29044	P. paniscus	Between Congo and Lukenie	M
Ppan128+0414+M		76		RG 29047	P. paniscus	Between Congo and Lukenie	M
Ppan115+0415+F		77		RG 26947	P. paniscus	Between Lomami and Congo	F
Ppan117+0415+F		78		RG 26993	P. paniscus	Between Lomami and Congo	F
Ppan118+0415+F		79		RG 26994	P. paniscus	Between Lomami and Congo	F
Ppan140+0415+F		80		RG 88041M3	P. paniscus	Between Lomami and Congo	F
Ppan141+0415+F		81		RG 88041M4	P. paniscus	Between Lomami and Congo	F
Ppan222+0415+F		82		MCZ 38020	P. paniscus	Between Lomami and Congo	F
Ppan107+0415+M		83		RG 15294	P. paniscus	Between Lomami and Congo	M
Ppan116+0415+M		84		RG 26971	P. paniscus	Between Lomami and Congo	M
Ppan119+0415+M		85		RG 26996	P. paniscus	Between Lomami and Congo	M
Ppan124+0415+M		86		RG 29036	P. paniscus	Between Lomami and Congo	M
Ppan125+0415+M		87		RG 29037	P. paniscus	Between Lomami and Congo	M
Ppan130+0415+M		88		RG 29050	P. paniscus	Between Lomami and Congo	M
Ppan137+0415+M		89		RG 84036M3	P. paniscus	Between Lomami and Congo	M
Ppan132+0416+F		90		RG 29060	P. paniscus	Between Lukeni and Kasai	F
Hsap519-1A2-F		91		Iziko 1871	H. sapiens	Southern African KhoeSan (hunter-gatherer)	F
Hsap646-1A2-F		92		Dart A0173c	H. sapiens	Southern African KhoeSan (hunter-gatherer)	F
Hsap299-1B2-F		93		MNHN 18849-1	H. sapiens	Kenya - Babinga (hunter-gatherer)	F
Hsap294-1B2-M		94		MNHN 4653	H. sapiens	Kenya - Babinga (hunter-gatherer)	M
Hsap295-1B2-M		95		MNHN 4577	H. sapiens	Kenya - Babinga (hunter-gatherer)	M
Hsap449-1E3B1-F		96		CAM-DL Af.21.0.150	H. sapiens	Kenya - Bantu-speaking (subsistence farming)	F
Hsap439-1E3B1-M		97		CAM-DL Af.21.0.052	H. sapiens	Kenya - Bantu-speaking (subsistence farming)	M
Hsap003-2C4-F		98		MNHN 4665	H. sapiens	Australian Aboriginal (hunter-gatherer)	F
Hsap319-2C4-M		99		CAM-DL AUS 080	H. sapiens	Australian Aboriginal (hunter-gatherer)	M
Hsap328-2C4-M		100		CAM-DL AUS 106	H. sapiens	Australian Aboriginal (hunter-gatherer)	M
Hsap335-4M-F		101		CAM-DL MEL 067	H. sapiens	Melanesian (horticulturalists)	F
Hsap356-4M-M		102		CAM-DL MEL 255	H. sapiens	Melanesian (horticulturalists)	M
Hsap196-6R2-F		103		MNHN 6188	H. sapiens	South Asian (predominantly agriculturalists)	F
Hsap185-6R2-M		104		MNHN 33325	H. sapiens	South Asian (predominantly agriculturalists)	M
Hsap129-712A-F		105		MNHN 17467	H. sapiens	Balkan region (predominantly agriculturalists)	F
Hsap116-7I2A-M		106		MNHN 17692	H. sapiens	Balkan region (predominantly agriculturalists)	M
Hsap219-8J1-F		107		MNHN 19235	H. sapiens	Near East (predominantly agriculturalists)	F
Hsap209-8J1-M		108		MNHN 7253	H. sapiens	Near East (predominantly agriculturalists)	M
Hsap180-9R1B-F		109		MNHN 35071-2	H. sapiens	Western Europe (predominantly agriculturalists)	F
Hsao136-9R1B-M		110		MNHN 35389	H. sapiens	Western Europe (predominantly agriculturalists)	M
[labels]
Species Sex
[labelvalues]
Gbb	F
Gbb	F
Gbb	F
Gbb	F
Gbb	M
Gbb	M
Gbb	M
Gbb	M
Gbb	F
Gbb	M
Gbg	F
Gbg	F
Gbg	M
Gbg	M
Gbg	F
Gbg	M
Gbg	F
Gbg	F
Gbg	M
Gbg	M
Ggg	F
Ggg	M
Ggg	M
Ggg	F
Ggg	M
Ggg	F
Ggg	F
Ggg	M
Ggg	M
Ggg	F
Ggg	M
Ggg	F
Ggg	M
Ggg	F
Ggg	F
Ggg	M
Ggg	M
Ggg	F
Ggg	F
Ggg	M
Ptv	F
Ptv	F
Ptv	F
Ptv	F
Ptv	M
Ptv	M
Ptv	M
Ptv	M
Ptv	F
Ptv	M
Ptt	F
Ptt	M
Ptt	F
Ptt	F
Ptt	F
Ptt	M
Ptt	M
Ptt	M
Ptt	F
Ptt	M
Pts	M
Pts	F
Pts	F
Pts	M
Pts	M
Pts	F
Pts	M
Pts	M
Pts	M
Pts	F
Ppan	F
Ppan	F
Ppan	F
Ppan	M
Ppan	M
Ppan	M
Ppan	F
Ppan	F
Ppan	F
Ppan	F
Ppan	F
Ppan	F
Ppan	M
Ppan	M
Ppan	M
Ppan	M
Ppan	M
Ppan	M
Ppan	M
Ppan	F
Hsap519-1A2-F	F
Hsap646-1A2-F	F
Hsap299-1B2-F	F
Hsap294-1B2-M	M
Hsap295-1B2-M	M
Hsap449-1E3B1-F	F
Hsap439-1E3B1-M	M
Hsap003-2C4-F	F
Hsap319-2C4-M	M
Hsap328-2C4-M	M
Hsap335-4M-F	F
Hsap356-4M-M	M
Hsap196-6R2-F	F
Hsap185-6R2-M	M
Hsap129-712A-F	F
Hsap116-7I2A-M	M
Hsap219-8J1-F	F
Hsap209-8J1-M	M
Hsap180-9R1B-F	F
Hsao136-9R1B-M	M
[rawpoints]				DESCRIPTION OF LANDMARK COORDINATES PER SPECIMEN
'Spec 1				(X 29 EACH using original landmark numbers as listed)
0	0			1 - Mathematical center of tooth (bounding box) in central basin of tooth
-9.028	-0.039			2 - Midpoint of bounding box at mesial edge, measures mesial side of MD axis
0	-8.256			3 - Midpoint of bounding box at lingual edge, measures lingual side of BL axis
9.028	-0.039			4 - Midpoint of bounding box at distal edge, measures distal side of MD axis
0	8.179			5 - Midpoint of bounding box at buccal edge, measures buccal side of BL axis
-9.105	-0.926			6 - Type 1 landmark where groove between Metaconid and Protoconid intersects with (corrected) perimeter
0.965	-6.829			7 - Type 1 landmark where groove between Metaconid and Entoconid intersects with perimeter
8.951	-1.003			8 - Type 1 landmark where groove between Entoconid and Hypoconulid intersects with perimeter (corrected if necessary)
4.282	4.707			9 - Type 1 landmark where groove between Hypoconulid and Hypoconid intersects with perimeter
-1.659	5.671			10 - Type 1 landmark where groove between Hypoconid and Protoconid intersects with perimeter
-7.021	-6.867			11 - Midpoint along arc of Metaconid along the perimeter
-2.585	-8.217			12 - Point marking the angle/measurement of mesial cusps, on lingual side at perimeter - an extension of a line drawn from cusp centers on mesial side
5.247	-6.983			13 - Point marking the angle/measurement of distal cusps, on lingual side at perimeter - an extension of a line drawn from cusp centers on distal side
7.137	-5.787			14 - Midpoint along arc of Entoconid along the perimeter
7.562	1.929			15 - Midpoint along arc of Hypoconulid along the perimeter
1.659	6.906			16 - Midpoint along arc of Hypoconid along the perimeter
-0.463	6.636			17 - Point marking the angle/measurement of distal cusps, on buccal side at perimeter - an extension of a line drawn from cusp centers on distal side
-5.247	7.369			18 - Point marking the angle/measurement of mesial cusps, on buccal side at perimeter - an extension of a line drawn from cusp centers on mesial side
-8.835	3.935			19 - Midpoint along arc of Protoconid along the perimeter
-4.012	-3.935			20 - Midpoint between landmarks 6 and 7, marking the midline of the Metaconid
4.938	-3.935			21 - Midpoint between landmarks 7 and 8, marking the midline of the Entoconid
6.597	1.736			22 - Midpoint between landmarks 8 and 9, marking the midline of the Hypoconulid
1.235	5.17			23 - Midpoint between landmarks 9 and 10, marking the midline of the Hypoconid
-5.44	2.392			24 - Midpoint between landmarks 10 and 6, marking the midline of the Protoconid
-3.434	-3.395			25 - Cusp center - Metaconid
3.549	-2.855			26 - Cusp center - Entoconid
3.858	1.003			27 - Cusp center - Hypoconulid
0.849	3.434			28 - Cusp center - Hypoconid
-4.321	1.852			29 - Cusp center - Protoconid
'Spec 2
0	0
-9.453	0
-0.036	-7.296
9.272	0
-0.072	7.296
-9.129	-1.797
0.287	-7.044
9.2	-0.791
3.881	4.6
-2.588	4.385
-6.47	-6.541
-1.69	-7.332
5.175	-6.829
6.756	-5.75
8.194	2.372
1.042	6.577
-1.115	6.505
-6.434	5.966
-9.309	2.013
-4.421	-4.457
4.708	-3.917
6.541	1.869
0.754	4.421
-5.787	1.258
-3.199	-3.235
3.306	-2.875
4.133	1.186
0.503	3.199
-4.673	0.97
'Spec 3
0	0
-9.289	0.013
0	-7.24
9.217	0.013
0	7.265
-9.039	-1.845
0.321	-6.989
9.181	-0.773
3.894	4.586
-2.537	4.407
-6.36	-6.454
-1.679	-7.275
5.18	-6.775
6.716	-5.739
8.181	2.442
1.036	6.515
-1.108	6.479
-6.431	5.943
-9.253	2.013
-4.395	-4.453
4.751	-3.917
6.609	1.871
0.75	4.407
-5.681	1.263
-3.109	-3.167
3.322	-2.845
4.144	1.156
0.571	3.192
-4.573	1.013
'Spec 4
0	0
-8.994	0
0	-7.439
8.964	-0.031
0	7.409
-8.75	-0.64
1.341	-6.159
8.903	-0.884
4.604	4.116
-1.707	4.604
-6.372	-5.946
-2.226	-7.318
5.244	-6.159
7.317	-5.061
8.201	1.921
2.073	6.494
-0.366	6.311
-5.397	6.525
-8.629	3.415
-3.659	-3.384
5.183	-3.567
6.768	1.555
1.402	4.421
-5.244	2.104
-3.171	-2.958
3.659	-2.561
4.146	0.976
1.067	3.262
-4.299	1.707
'Spec 5
0	0
-9.486	0
-0.042	-8.358
9.486	0
-0.042	8.316
-9.277	-1.003
0.836	-7.271
9.444	-1.128
4.388	4.472
-2.09	5.349
-7.021	-6.853
-2.675	-8.316
4.931	-6.979
6.937	-5.85
8.441	2.131
1.379	6.77
-0.878	6.436
-5.6	7.104
-9.027	3.385
-4.221	-4.053
5.098	-4.304
6.853	1.672
1.044	4.931
-5.725	2.173
-3.552	-3.51
3.426	-3.009
4.179	1.087
0.71	3.427
-4.555	1.755
'Spec 6
0	0
-9.294	0
0	-8.06
9.265	0
-0.029	8.089
-9.236	-1.003
0.459	-7.027
9.121	-1.003
4.647	4.188
-1.664	5.02
-7.343	-6.712
-3.041	-8.06
5.077	-7.285
6.913	-5.994
8.347	2.008
2.208	6.626
-0.086	5.766
-5.106	7.057
-8.691	3.299
-4.36	-3.929
4.79	-3.987
6.913	1.693
1.491	4.59
-5.393	2.094
-3.672	-3.327
3.471	-3.011
4.102	1.004
1.061	3.213
-4.331	1.578
'Spec 7
0	0
-9.997	0
0	-8.19
9.921	0.039
0	8.268
-10.074	-0.923
1.154	-6.768
9.768	0.385
5.192	5.691
-2.384	5.999
-7.421	-6.498
-2.653	-7.998
5.615	-6.152
7.806	-4.73
8.46	3.307
1.923	7.768
-0.807	7.499
-5.729	7.768
-9.228	3.73
-4.383	-3.845
5.461	-3.268
7.46	2.846
1.346	5.845
-6.191	2.538
-3.614	-3.23
3.923	-2.384
4.23	1.654
0.962	3.922
-4.652	1.846
'Spec 8
0	0
-10.019	0
0.026	-8.424
10.018	-0.053
0.026	8.318
-9.806	-0.426
0.824	-7.016
9.965	-0.957
4.704	4.677
-2.153	5.82
-8.026	-6.458
-3.322	-8.398
5.501	-6.777
7.547	-5.528
9.009	2.338
1.674	7.175
-0.638	6.962
-5.235	7.414
-9.275	4.172
-4.491	-3.721
5.368	-3.96
7.414	1.913
1.249	5.288
-5.926	2.657
-3.96	-3.242
3.747	-2.764
4.544	1.196
0.877	3.561
-4.598	2.099
'Spec 9
0	0
-8.906	0
-0.035	-7.125
8.835	0
0	7.124
-8.871	-1.118
0.209	-6.706
8.73	-1.118
4.365	3.282
-1.607	4.295
-6.81	-6.112
-2.515	-7.125
4.784	-6.95
6.565	-5.937
8.137	1.152
1.99	5.832
-0.105	5.972
-5.518	6.356
-8.696	2.514
-4.331	-3.912
4.435	-3.912
6.565	1.082
1.327	3.771
-5.274	1.536
-3.353	-3.074
3.282	-2.969
4.086	0.558
0.978	2.828
-4.331	1.187
'Spec 10
0	0
-10.436	0.04
0	-8.277
10.516	0.04
0	8.317
-10.436	-0.84
1.439	-7.637
10.156	-1.04
5.598	4.118
-1.52	5.238
-7.517	-7.118
-2.719	-8.237
5.598	-7.517
7.997	-5.998
9.116	1.679
2.719	6.757
0.16	6.237
-6.238	7.517
-9.836	3.718
-4.518	-4.239
5.798	-4.319
7.837	1.519
1.959	4.678
-5.998	2.319
-3.719	-3.559
3.958	-2.999
4.478	0.879
1.399	3.318
-4.918	1.839
'Spec 11
0	0
-9.48	-0.003
0.042	-7.383
9.563	-0.003
0.042	7.308
-9.412	-0.718
-0.332	-7.145
9.461	-0.82
4.701	4.825
-1.692	5.131
-7.405	-5.954
-2.985	-7.383
4.667	-7.213
6.707	-6.192
8.577	2.411
2.116	7.036
-0.06	6.526
-5.399	7.036
-9.072	3.635
-4.923	-3.982
4.395	-4.05
6.979	1.901
1.47	4.995
-5.535	2.275
-3.672	-2.939
3.367	-3.143
4.285	1.21
1.062	3.499
-4.481	1.867
'Spec 12
0	0
-10.014	0
-0.03	-7.458
9.955	0
-0.03	7.428
-9.834	-1.354
0.451	-7.308
9.774	-0.902
4.211	4.33
-2.015	4.3
-7.127	-6.616
-2.436	-7.549
5.504	-6.917
7.218	-5.955
8.331	1.894
1.684	6.405
-0.721	6.315
-6.255	6.526
-9.503	2.285
-4.721	-4.331
5.113	-4.12
6.977	1.684
1.083	4.24
-5.924	1.443
-3.518	-3.338
3.654	-2.962
4.15	0.932
0.782	3.127
-4.751	1.082
'Spec 13
0	0
-10.543	0.03
-0.033	-8.148
10.484	0.006
-0.033	8.13
-10.385	-1.392
1.468	-7.279
10.437	-0.997
5.182	5.048
-2.127	5.364
-6.908	-6.686
-1.693	-8.109
5.735	-6.963
8.106	-5.778
9.093	2.322
2.1	7.577
-0.547	7.103
-7.224	6.984
-10.385	3.152
-4.538	-4.276
5.933	-4.158
7.829	1.966
1.468	5.127
-6.276	2.045
-3.471	-3.328
3.997	-2.933
4.471	1.097
0.994	3.784
-5.17	1.65
'Spec 14
0	0
-10.831	0.006
0	-8.163
10.858	-0.039
0	8.086
-10.82	-1.289
0.39	-7.421
10.741	-0.664
4.335	4.492
-1.992	4.766
-7.813	-6.601
-2.774	-8.163
5.742	-6.913
7.695	-5.82
8.788	1.993
1.796	7.461
-0.703	6.836
-6.484	7.305
-10.234	2.813
-5.195	-4.374
5.468	-4.101
7.577	1.797
1.132	4.649
-6.406	1.797
-3.906	-3.242
3.906	-2.929
4.413	0.977
0.898	3.672
-5	1.446
'Spec 15
0	0
-10.066	0
0	-7.931
10.066	0
0	7.931
-9.952	-0.762
0.458	-7.168
9.99	-0.762
4.194	4.576
-1.907	5.071
-7.931	-6.634
-3.165	-7.816
5.605	-6.901
7.397	-5.834
8.427	2.288
1.487	6.673
-0.877	6.406
-5.948	7.512
-9.647	3.508
-4.804	-3.889
5.147	-3.965
7.016	1.869
1.144	4.805
-5.948	2.25
-4.004	-3.279
3.66	-2.898
4.194	1.106
0.801	3.279
-4.804	1.716
'Spec 16
0	0
-10.224	0
-0.032	-8.319
10.224	0
0	8.35
-10.16	-0.857
0.825	-7.144
10.033	-0.572
5.143	5.398
-1.334	6.064
-7.684	-6.604
-3.017	-8.096
5.413	-6.953
7.557	-5.429
9.144	2.794
2.349	7.525
-0.302	7.08
-5.763	7.684
-9.351	4.096
-4.683	-4.001
5.477	-3.842
7.557	2.286
1.841	5.747
-5.811	2.572
-3.874	-3.239
3.746	-2.731
4.508	1.333
1.143	3.747
-4.731	2.064
'Spec 17
0	0
-9.393	0
0	-7.772
9.431	0
0.038	7.733
-9.205	-1.019
-0.157	-7.53
9.393	-0.302
3.999	4.791
-1.962	5.357
-6.941	-6.413
-2.339	-7.847
5.244	-7.281
7.055	-6.036
8.111	2.678
1.434	7.318
-0.792	6.979
-5.772	7.167
-8.941	3.32
-4.64	-4.376
4.64	-3.924
6.677	2.226
1.056	5.055
-5.47	2.15
-3.357	-3.169
3.584	-3.094
4.037	1.32
0.717	3.584
-4.452	1.697
'Spec 18
0	0
-9.465	-0.005
-0.055	-7.54
9.354	0.031
0.018	7.603
-9.391	-0.887
0.827	-6.621
9.244	-1.402
4.944	4.405
-1.93	5.545
-6.671	-6.217
-2.408	-7.54
5.017	-6.952
7.039	-5.776
8.582	1.649
2.113	7.162
-0.202	7.015
-5.532	6.868
-8.73	3.634
-4.209	-3.828
5.017	-4.085
7.039	1.428
1.415	4.957
-5.679	2.347
-3.363	-3.056
3.473	-2.836
4.319	0.803
1.047	3.634
-4.429	1.832
'Spec 19
0	0
-10.734	0
0.035	-8.224
10.803	0
0.035	8.15
-10.77	-1.144
-0.85	-7.929
10.766	-0.959
5.345	5.679
-2.03	5.789
-8.558	-6.528
-3.321	-8.15
5.456	-7.855
7.484	-6.786
9.402	2.692
2.1	7.596
-0.408	7.154
-6.308	7.523
-10.291	3.724
-5.792	-4.499
4.903	-4.389
8	2.323
1.62	5.753
-6.419	2.323
-4.243	-3.246
3.759	-3.319
4.755	1.364
0.994	3.724
-5.165	1.88
'Spec 20
0	0
-10.731	0
-0.042	-8.669
10.774	0
-0.013	8.672
-10.31	-0.842
-0.084	-7.744
10.69	-0.8
5.009	5.471
-2.398	5.387
-7.996	-6.691
-2.903	-8.501
5.556	-7.281
7.66	-6.229
9.709	2.864
1.936	8.08
-0.505	6.944
-6.649	8.164
-10.31	3.535
-5.134	-4.293
5.345	-4.293
7.87	2.315
1.305	5.387
-6.27	2.23
-3.913	-3.367
3.872	-3.114
4.798	1.347
1.053	3.914
-5.134	1.641
'Spec 21
0	0
-8.327	0
0.027	-6.664
8.381	0
0.027	6.651
-8.246	-0.73
0.919	-6.002
8.354	-0.838
4.109	4.92
-1.487	5.38
-5.867	-5.407
-2.028	-6.65
4.65	-5.866
6.38	-4.812
7.894	2.46
1.649	6.488
-0.406	6.191
-5.11	6.299
-7.975	3.839
-3.704	-3.325
4.65	-3.406
6.191	1.974
1.352	5.164
-4.812	2.325
-2.974	-2.649
3.244	-2.352
4.055	1.244
0.838	3.271
-3.974	1.892
'Spec 22
0	0
-8.605	-0.034
0	-7.352
8.638	0
0	7.317
-8.537	-0.746
0.779	-7.08
8.401	-1.254
5.284	3.929
-1.254	4.133
-5.895	-6.132
-1.762	-7.352
4.133	-6.979
6.267	-5.759
8.299	1.49
3.286	6.572
0.847	6.064
-5.353	6.335
-8.199	2.71
-3.93	-3.964
4.607	-4.201
6.91	1.287
2.032	4.031
-4.879	1.626
-2.914	-3.049
3.15	-2.88
4.166	0.711
1.626	3.218
-4.066	1.321
'Spec 23
0	0
-9.195	-0.002
0.013	-7.228
9.221	-0.002
0.013	7.256
-9.227	-0.482
0.845	-6.492
9.061	-1.089
5.001	4.09
-1.01	4.602
-6.765	-5.725
-2.896	-7.292
4.657	-6.494
6.727	-5.373
8.518	1.724
2.667	5.977
0.173	5.817
-4.878	6.392
-8.235	3.227
-4.207	-3.487
4.937	-3.807
7.047	1.437
1.995	4.314
-5.134	2.044
-3.44	-2.815
3.338	-2.624
4.17	0.861
1.292	2.939
-4.143	1.629
'Spec 24
0	0
-8.723	0.066
-0.033	-6.212
8.701	0.033
-0.022	6.311
-8.69	-0.529
1.454	-5.98
8.557	-1.388
5.286	4.031
-0.793	4.526
-6.179	-5.485
-2.28	-6.212
4.659	-6.245
6.971	-5.254
8.326	1.52
3.205	6.079
0.562	6.013
-5.088	6.145
-8.029	3.337
-3.601	-3.238
4.956	-3.635
6.905	1.255
2.247	4.229
-4.692	2.015
-3.073	-2.709
3.469	-2.511
4.13	0.826
1.619	3.106
-4.097	1.685
'Spec 25
0	0
-8.999	0.027
-0.027	-7.54
8.999	0.027
0	7.593
-8.918	-0.541
1.054	-6.54
8.945	-0.27
4.324	4.324
-1.405	4.918
-6.513	-5.837
-2.405	-7.378
5.296	-6.567
7.323	-4.945
7.431	2.378
2.216	7.053
-0.135	6.512
-5.108	6.891
-8.269	3.486
-3.946	-3.54
5.08	-3.432
6.648	2.081
1.486	4.756
-5.243	2.297
-3.27	-2.811
3.648	-2.432
3.729	1.243
1.108	3.567
-4.054	1.756
'Spec 26
0	0
-8.267	0
0.028	-7.05
8.38	0
0.028	7.049
-8.267	-0.595
0.453	-6.37
8.267	-1.133
4.077	4.444
-1.642	5.35
-6.342	-5.691
-2.576	-6.965
4.586	-6.512
6.341	-5.606
7.842	1.953
1.642	6.624
-0.34	6.454
-4.53	6.709
-7.587	3.68
-3.907	-3.483
4.331	-3.851
6.299	1.613
1.274	4.897
-4.983	2.349
-3.171	-2.803
3.227	-2.803
4.02	0.877
0.906	3.284
-3.794	1.783
'Spec 27
0	0
-8.595	0.028
0.007	-6.808
8.609	0.028
0.04	6.864
-8.595	-0.299
0.629	-6.22
8.479	-0.725
4.423	4.214
-1.424	4.748
-6.535	-5.336
-2.675	-6.776
4.75	-6.481
6.712	-5.336
7.857	1.99
1.904	6.504
-0.353	5.981
-4.703	6.569
-7.778	3.331
-4.016	-3.21
4.488	-3.505
6.418	1.663
1.348	4.411
-5.161	2.219
-3.296	-2.654
3.311	-2.654
3.899	0.976
0.89	3.201
-3.918	1.663
'Spec 28
0	0
-8.762	0
0	-7.302
8.73	0.032
0	7.27
-8.667	-0.349
0.381	-6.571
8.698	-0.667
4.825	4.73
-1.365	6
-6.73	-5.556
-2.762	-7.238
4.794	-6.571
6.73	-5.333
8.127	2.349
2.286	7.079
-0.032	6.635
-4.571	7.143
-8.032	4.571
-4.127	-3.429
4.571	-3.619
6.794	1.936
1.746	5.333
-4.984	2.889
-3.302	-2.762
3.397	-2.635
4.063	1.175
1.143	3.524
-3.937	2.286
'Spec 29
0	0
-9.161	0
0	-6.684
9.16	0
0	6.747
-9.161	-0.371
0.742	-5.601
9.067	-1.021
4.642	4.674
-1.486	5.045
-7.056	-4.951
-2.971	-6.684
5.013	-5.972
6.901	-4.827
8.294	2.105
1.989	6.632
-0.31	6.004
-4.642	6.407
-8.078	3.436
-4.24	-2.97
4.92	-3.342
6.808	1.765
1.516	4.828
-5.323	2.322
-3.59	-2.475
3.466	-2.352
4.147	1.115
1.021	3.25
-4.023	1.703
'Spec 30
0	0
-8.634	0
-0.036	-6.901
8.599	-0.073
0	6.828
-8.634	-0.362
0.181	-6.539
8.526	-1.12
4.155	4.407
-1.77	4.732
-6.503	-5.239
-2.601	-6.828
4.263	-6.359
5.925	-5.239
7.84	2.023
1.734	6.756
-0.072	6.43
-4.552	5.925
-7.695	3.323
-4.19	-3.36
4.336	-3.83
6.287	1.589
1.156	4.588
-5.202	2.24
-3.215	-2.71
2.963	-2.71
3.902	0.939
0.867	3.323
-3.865	1.662
'Spec 31
0	0
-9.163	0
0	-6.802
9.22	0.028
0	6.773
-9.135	-0.313
0.655	-6.204
9.192	-0.541
4.753	4.61
-1.366	4.467
-6.801	-5.18
-2.675	-6.716
5.208	-6.119
7.171	-5.037
8.367	2.419
2.391	6.516
0	5.919
-4.866	6.573
-8.196	3.386
-4.24	-3.188
4.895	-3.415
7.029	2.02
1.651	4.524
-5.208	2.162
-3.358	-2.533
3.586	-2.476
4.183	1.195
1.224	3.187
-4.098	1.736
'Spec 32
0	0
-8.435	0.025
0	-6.339
8.435	-0.025
0	6.314
-8.161	-0.748
0.624	-5.914
8.386	-0.474
4.417	4.293
-1.447	4.018
-5.74	-4.966
-2.096	-6.039
4.692	-6.064
6.763	-4.816
8.286	2.396
2.246	6.289
-0.05	6.04
-4.866	5.591
-7.686	2.471
-3.843	-3.344
4.492	-3.194
6.414	1.847
1.473	4.068
-4.767	1.573
-2.845	-2.495
3.369	-2.42
4.168	1.198
1.173	3.095
-3.843	1.198
'Spec 33
0	0
-9.504	-0.06
0.029	-7.104
9.529	-0.027
0.061	7.049
-9.407	-0.448
1.321	-6.329
9.432	-1.288
5.263	4.367
-0.876	4.206
-6.79	-5.424
-2.395	-7.072
4.811	-6.587
7.429	-5.456
9.303	2.008
3.228	6.403
0.578	6.242
-5.627	6.597
-8.729	3.107
-4.108	-3.356
5.263	-3.841
7.396	1.556
2.129	4.141
-5.11	1.911
-3.332	-2.71
3.615	-2.71
4.585	0.91
1.58	3.172
-4.399	1.556
'Spec 34
0	0
-8.692	0
0	-6.953
8.759	0.034
0	6.954
-8.692	-0.501
0.434	-6.519
8.725	-0.601
4.246	4.313
-1.739	4.948
-6.285	-5.382
-2.441	-6.853
4.68	-6.452
6.552	-5.382
7.622	2.207
1.839	6.62
-0.134	5.985
-4.714	6.553
-7.823	3.176
-4.179	-3.51
4.546	-3.543
6.485	1.839
1.203	4.514
-5.215	2.24
-3.076	-2.674
3.31	-2.708
3.811	1.037
0.936	3.31
-3.811	1.605
'Spec 35
0	0
-8.436	0
-0.031	-6.798
8.467	0
-0.031	6.86
-8.436	-0.309
0.34	-5.964
8.467	-0.711
4.295	4.419
-1.081	4.882
-6.551	-5.161
-2.997	-6.737
4.512	-6.211
6.52	-5.037
7.756	2.286
2.194	6.396
-0.031	6.242
-4.048	6.334
-7.354	3.461
-4.079	-3.152
4.357	-3.307
6.397	1.885
1.607	4.666
-4.82	2.286
-3.275	-2.534
3.214	-2.41
3.832	1.174
1.144	3.152
-3.677	1.73
'Spec 36
0	0
-9.618	0.015
-0.015	-8.284
9.677	0.015
-0.015	8.313
-9.618	-0.815
0.608	-7.217
9.381	-1.467
4.994	4.964
-1.526	5.083
-7.721	-6.832
-2.949	-8.166
4.846	-7.187
6.743	-5.854
9.588	2.178
2.475	7.187
-0.015	7.306
-5.705	7.572
-9.38	3.63
-4.52	-3.957
4.964	-4.253
7.276	1.704
1.764	4.994
-5.587	2.208
-3.72	-3.394
3.423	-2.89
4.757	1.082
1.2	3.571
-4.638	1.793
'Spec 37
0	0
-8.867	0.031
0.03	-7.565
8.837	0
0	7.596
-8.867	0.121
1.029	-6.93
8.776	-0.847
5.508	4.055
-0.787	5.205
-6.869	-5.87
-2.754	-7.626
4.751	-7.02
6.869	-5.477
8.292	1.786
3.389	6.628
0.908	6.264
-4.418	7.233
-7.807	4.297
-3.904	-3.419
4.902	-3.903
7.142	1.574
2.391	4.6
-4.751	2.633
-3.298	-2.935
3.45	-2.723
4.085	0.938
1.695	3.284
-3.873	2.209
'Spec 38
0	0
-8.294	0.026
0	-6.815
8.242	0
-0.026	6.842
-8.268	-0.475
0.978	-6.313
8.242	-1.294
4.887	3.962
-1.083	4.649
-6.181	-5.627
-2.589	-6.789
4.174	-6.525
6.155	-5.468
7.872	1.585
2.8	6.261
0.344	5.997
-4.57	6.208
-7.687	3.302
-3.724	-3.408
4.544	-3.883
6.472	1.321
1.902	4.306
-4.728	2.061
-3.17	-2.774
3.038	-2.721
3.883	0.793
1.268	3.064
-3.804	1.664
'Spec 39
0	0
-8.427	0.029
0	-7.095
8.427	0
0	7.094
-8.34	-0.435
0.869	-6.632
8.398	-0.551
4.807	4.372
-0.724	4.662
-5.937	-5.705
-1.998	-7.153
4.633	-6.863
6.921	-5.415
7.819	2.2
3.011	6.515
0.434	6.399
-4.981	6.631
-7.848	3.619
-3.707	-3.562
4.604	-3.62
6.631	1.911
2.056	4.546
-4.547	2.114
-2.954	-2.867
3.359	-2.693
3.822	1.071
1.448	3.185
-3.967	1.766
'Spec 40
0	0
-9.677	0.034
0	-7.99
9.849	0
0.069	8.023
-9.746	-0.414
1.963	-7.508
9.78	-0.62
5.338	5.096
-0.827	6.095
-6.647	-6.612
-2.445	-7.955
5.338	-7.37
7.645	-5.751
9.126	2.617
2.961	7.507
0.344	7.197
-5.235	7.059
-8.782	4.614
-3.788	-3.961
5.854	-4.236
7.542	2.1
2.307	5.544
-5.407	2.892
-3.237	-3.237
3.96	-2.859
4.787	1.239
1.618	3.753
-4.236	2.341
'Spec 41
0	0
-5.962	0
0	-5.126
5.962	0.024
0	5.174
-5.962	-0.208
0.418	-5.08
4.825	-3.456
3.828	3.318
-0.603	4.501
-4.5	-4.338
-2.018	-5.103
1.717	-5.15
3.016	-4.918
5.915	-0.116
2.088	5.174
0.858	5.127
-2.83	5.197
-5.22	3.295
-2.761	-2.598
2.621	-4.245
4.338	-0.116
1.624	3.921
-3.317	2.135
-2.227	-2.134
1.508	-2.459
2.969	0
1.067	2.599
-2.575	1.647
'Spec 42
0	0
-5.793	0
0	-5.267
5.772	0
0	5.267
-5.709	-0.126
0.169	-5.203
5.183	-2.949
4.003	3.307
-0.674	4.592
-4.213	-3.982
-1.875	-5.077
1.854	-5.203
3.16	-4.782
5.73	0.211
2.023	4.782
0.653	4.951
-2.781	4.972
-4.908	3.581
-2.823	-2.612
2.697	-4.087
4.635	0.126
1.686	4.066
-3.223	2.402
-2.128	-1.98
1.538	-2.36
2.886	0.105
0.99	2.338
-2.422	1.727
'Spec 43
0	0
-5.875	0
-0.01	-5.263
5.855	0
-0.01	5.307
-5.897	-0.236
-0.268	-4.533
5.253	-2.385
3.878	3.566
-0.805	4.469
-4.78	-3.717
-2.18	-4.984
2.117	-5.199
3.427	-4.683
5.79	0.731
2.031	5.135
0.742	5.221
-2.739	5.006
-5.166	3.266
-3.061	-2.342
2.482	-3.437
4.609	0.58
1.579	4.018
-3.319	2.127
-2.374	-1.848
1.73	-2.363
2.89	0.387
1.021	2.578
-2.545	1.611
'Spec 44
0	0
-5.893	0.021
0	-4.97
5.893	-0.021
0	5.012
-5.83	-0.483
0.525	-4.824
5.663	-2.286
4.153	3.502
-0.23	4.299
-4.131	-4.048
-1.614	-4.97
2.286	-4.907
3.796	-4.383
5.83	0.713
2.475	4.739
0.86	4.844
-3.061	4.991
-5.18	3.334
-2.663	-2.622
3.083	-3.481
4.95	0.65
2.014	3.921
-2.999	1.908
-2.055	-2.034
1.93	-2.139
2.957	0.377
1.238	2.391
-2.579	1.657
'Spec 45
0	0
-5.974	-0.128
0.023	-5.311
6.066	0
0.023	5.276
-6.032	-0.035
0.069	-5.183
5.834	-2.975
3.858	3.626
-0.814	4.788
-4.626	-4.09
-2.022	-5.253
2.208	-5.299
3.533	-4.881
5.694	0.302
1.836	5.207
0.511	5.207
-2.999	5.253
-5.416	3.58
-2.975	-2.603
3.021	-4.114
4.811	0.256
1.464	4.23
-3.487	2.348
-2.325	-1.999
1.766	-2.44
2.905	0.14
0.906	2.65
-2.696	1.767
'Spec 46
0	0
-5.692	0
-0.022	-5.063
5.637	-0.023
0	5.062
-5.647	-0.248
0.54	-4.613
5.153	-2.498
4.073	3.285
-0.135	4.522
-4.162	-4.006
-1.822	-5.063
2.138	-4.748
3.578	-4.411
5.4	0.495
2.385	4.815
0.9	4.86
-2.655	4.927
-4.77	3.42
-2.542	-2.408
2.858	-3.533
4.635	0.405
1.958	3.87
-2.925	2.115
-2.025	-1.981
1.778	-2.183
2.678	0.247
1.238	2.385
-2.407	1.71
'Spec 47
0	0
-6.435	0
0	-5.717
6.533	0
0.033	5.651
-6.468	-0.262
0.49	-5.325
5.782	-2.777
4.377	3.658
-0.327	5.128
-4.834	-4.639
-2.221	-5.651
2.189	-5.292
3.724	-4.835
6.533	0.49
2.352	5.161
0.817	5.357
-2.907	5.618
-5.357	3.887
-2.973	-2.744
3.136	-4.051
5.063	0.392
1.993	4.442
-3.397	2.45
-2.417	-2.287
1.829	-2.385
3.267	0.294
1.176	2.548
-2.711	1.96
'Spec 48
0	0
-5.846	0
0.019	-5.18
5.865	-0.019
0.019	5.141
-5.865	-0.324
-0.172	-5.046
5.141	-2.571
3.903	3.427
0.19	4.398
-4.532	-3.961
-2.209	-5.104
1.79	-5.104
3.161	-4.78
5.827	0.609
2.285	4.455
0.952	4.646
-2.438	5.122
-4.704	3.579
-3.009	-2.647
2.494	-3.79
4.513	0.438
2.056	3.979
-2.761	2.132
-2.266	-1.924
1.58	-2.362
2.875	0.285
1.161	2.208
-2.304	1.751
'Spec 49
0	0
-6.206	-0.02
0	-5.339
6.226	-0.02
0	5.32
-6.186	-0.564
-0.182	-5.219
5.4	-3.304
4.211	3.345
-0.383	4.574
-4.816	-4.392
-2.076	-5.299
1.733	-5.339
3.002	-5.037
6.085	-0.04
2.257	4.635
0.846	4.856
-3.184	5.259
-5.541	3.244
-3.204	-2.942
2.599	-4.272
4.795	0.02
1.914	3.929
-3.305	1.975
-2.418	-2.216
1.511	-2.478
3.042	0.02
1.088	2.297
-2.781	1.632
'Spec 50
0	0
-6.161	0
-0.024	-5.247
6.207	0
0	5.2
-6.161	-0.281
0.14	-4.849
5.575	-2.577
3.935	3.56
-0.375	4.544
-4.544	-3.959
-1.991	-5.177
2.084	-5.13
3.56	-4.708
6.043	0.562
2.295	5.012
0.843	5.059
-2.741	5.176
-5.083	3.303
-2.998	-2.553
2.834	-3.748
4.755	0.468
1.827	4.029
-3.233	2.131
-2.202	-1.968
1.768	-2.342
2.998	0.281
1.124	2.483
-2.483	1.686
'Spec 51
0	0
-6.071	0
0	-4.913
6.071	0.02
0	4.912
-5.951	-0.719
-0.02	-4.714
4.893	-3.076
3.675	3.514
-0.758	4.433
-4.213	-3.855
-1.617	-4.793
1.718	-4.873
2.836	-4.634
6.091	0.179
1.718	4.693
0.58	4.792
-3.255	4.713
-5.332	2.815
-2.995	-2.736
2.477	-3.915
4.274	0.179
1.498	3.994
-3.335	1.817
-2.097	-1.878
1.478	-2.277
3.016	0.139
0.879	2.336
-2.636	1.437
'Spec 52
0	0
-6.298	0.023
0.023	-5.63
6.299	0
0.023	5.606
-6.229	-0.393
0.946	-5.099
5.122	-3.3
3.807	4.083
-0.83	5.329
-4.037	-4.315
-1.592	-5.653
2.192	-5.099
3.507	-4.823
6.207	0.369
1.685	5.445
0.393	5.606
-3.161	5.514
-5.191	3.576
-2.653	-2.769
3.092	-4.176
4.5	0.323
1.477	4.637
-3.576	2.468
-2.053	-2.169
1.777	-2.423
3.161	0.138
0.854	2.699
-2.63	1.776
'Spec 53
0	0
-6.223	0.021
0	-5.222
6.201	-0.022
0	5.221
-6.181	-0.64
-0.235	-4.476
5.264	-3.027
4.092	3.687
-1.194	4.433
-4.945	-4.007
-2.217	-5.009
1.96	-5.222
3.175	-4.817
6.223	0.383
1.875	5.157
0.511	5.157
-3.24	4.784
-5.776	2.941
-3.176	-2.6
2.536	-3.772
4.667	0.298
1.428	4.028
-3.708	1.918
-2.472	-2.004
1.619	-2.408
3.09	0.149
0.874	2.536
-2.899	1.492
'Spec 54
0	0
-6.229	0
0	-5.176
6.229	0
-0.022	5.132
-6.185	-0.439
0.373	-4.496
5.308	-2.808
3.663	4.211
-0.877	4.562
-4.518	-3.86
-1.842	-5.11
2.083	-4.606
3.399	-4.387
6.075	0.877
1.469	5.044
0.241	4.979
-3.202	5.11
-5.483	3.092
-2.917	-2.479
2.829	-3.619
4.474	0.614
1.294	4.386
-3.575	2.04
-2.237	-1.93
1.623	-2.193
3.07	0.417
0.724	2.456
-2.742	1.535
'Spec 55
0	0
-6.174	0
0	-5.281
6.173	-0.019
0	5.243
-6.174	-0.242
0.446	-4.946
5.151	-3.422
4.016	4.072
-0.855	4.76
-4.556	-4.128
-1.953	-5.225
1.934	-5.225
3.273	-4.909
6.099	0.353
1.785	5.113
0.539	5.039
-2.975	5.002
-5.318	3.477
-2.827	-2.566
2.77	-4.165
4.556	0.26
1.562	4.444
-3.533	2.324
-2.269	-2.027
1.618	-2.436
3.087	0.167
0.93	2.547
-2.603	1.729
'Spec 56
0	0
-6.062	0.022
0	-4.978
6.085	0
0	4.912
-6.04	-0.464
0.443	-4.712
5.133	-2.765
3.695	3.518
-0.973	4.226
-4.425	-4.137
-1.792	-4.889
2.124	-4.911
3.386	-4.624
5.908	0.421
1.726	4.846
0.443	4.779
-3.274	4.669
-5.465	2.832
-2.832	-2.61
2.832	-3.739
4.425	0.31
1.372	3.872
-3.54	1.859
-2.212	-2.057
1.682	-2.323
2.943	0.244
0.841	2.434
-2.743	1.394
'Spec 57
0	0
-6.229	0
0	-5.136
6.283	-0.027
-0.014	5.137
-6.284	-0.519
0.327	-4.726
5.546	-2.841
3.633	3.415
-1.011	4.126
-4.645	-4.098
-2.022	-5.081
2.131	-5.108
3.442	-4.617
6.256	0.246
1.748	5.055
0.464	5.027
-3.252	4.7
-5.601	2.787
-2.978	-2.65
2.923	-3.852
4.617	0.192
1.256	3.743
-3.634	1.804
-2.295	-2.049
1.721	-2.267
3.114	0.137
0.901	2.541
-2.787	1.339
'Spec 58
0	0
-6.282	-0.019
-0.018	-5.169
6.282	0
0	5.168
-6.264	-0.22
0.639	-4.913
5.387	-3.014
3.744	3.433
-0.53	4.328
-4.511	-4.146
-2.027	-5.132
2.21	-4.895
3.543	-4.639
6.209	0.273
1.954	4.839
0.566	4.93
-2.739	5.076
-5.022	3.049
-2.794	-2.575
2.995	-3.945
4.584	0.182
1.589	3.889
-3.397	2.063
-2.246	-2.046
1.808	-2.32
3.123	0.146
1.004	2.428
-2.502	1.57
'Spec 59
0	0
-6.073	0
0.022	-4.971
6.052	0
0	4.95
-6.073	-0.281
0.173	-4.906
4.842	-3.523
3.588	2.659
-0.983	3.567
-4.366	-3.912
-1.815	-4.992
1.751	-4.971
2.983	-4.927
6.009	-0.454
1.859	4.085
0.605	4.064
-2.982	3.783
-5.187	1.989
-2.918	-2.593
2.561	-4.214
4.128	-0.41
1.47	3.113
-3.847	1.492
-2.183	-1.88
1.47	-2.399
[truncated: 1,560 more rows]
