# Supplementary material for: A mathematical landmark-based method for measuring worn molars in hominoid systematics
Source: PeerJ. 2019 May 23;7:e6990. doi: 10.7717/peerj.6990 (PMC6535218; doi:10.7717/peerj.6990)
Supplement: File S2 [file peerj-07-6990-s002.xlsx]

## Sheet: Sheet1
Group Statistics - species level							Group Statistics - subspecies level
Species		Mean	Std. Deviation	Valid N (listwise)			Subspecies		Mean	Std. Deviation	Valid N (listwise)
				Unweighted	Weighted						Unweighted	Weighted
Gorilla beringei	lengthMD	19.6209	1.26761	20	20		G. b. beringei	lengthMD	18.9424	1.04202	10	10
	breadthMesial	15.3518	0.885489	20	20			breadthMesial	15.1075	0.950085	10	10
	breadthDistal	14.8458	0.57884	20	20			breadthDistal	14.5249	0.501363	10	10
	breadthBLGroove	12.5842	0.745196	20	20			breadthBLGroove	12.3465	0.834248	10	10
	DistaledgeBuccgroove	2.08814	0.339409	20	20			DistaledgeBuccgroove	2.0459	0.355614	10	10
	ratiohypcnld	0.167495	0.0243572	20	20			ratiohypcnld	0.169013	0.0296762	10	10
	AngleMesial	1.3539	0.0639808	20	20			AngleMesial	1.35417	0.074691	10	10
	AngleDistal	1.97296	0.0307874	20	20			AngleDistal	1.97931	0.0248763	10	10
	MesialEdgeBuccgroove	4.39814	0.5343	20	20			MesialEdgeBuccgroove	4.13119	0.466819	10	10
Gorilla gorilla	lengthMD	17.6621	0.900929	20	20		G. b. graueri	lengthMD	20.2993	1.13293	10	10
	breadthMesial	13.8009	0.93859	20	20			breadthMesial	15.5961	0.787415	10	10
	breadthDistal	13.6228	0.693611	20	20			breadthDistal	15.1668	0.476519	10	10
	breadthBLGroove	11.5194	0.837105	20	20			breadthBLGroove	12.8218	0.59236	10	10
	DistaledgeBuccgroove	1.98067	0.41732	20	20			DistaledgeBuccgroove	2.13038	0.335814	10	10
	ratiohypcnld	0.177534	0.0306485	20	20			ratiohypcnld	0.165978	0.0191487	10	10
	AngleMesial	1.39722	0.0504793	20	20			AngleMesial	1.35362	0.0553444	10	10
	AngleDistal	1.91941	0.0432055	20	20			AngleDistal	1.96661	0.035954	10	10
	MesialEdgeBuccgroove	4.00725	0.628218	20	20			MesialEdgeBuccgroove	4.66509	0.475809	10	10
Pan troglodytes	lengthMD	12.3467	0.529608	30	30		G. g. gorilla	lengthMD	17.6621	0.900929	20	20
	breadthMesial	10.1991	0.5172	30	30			breadthMesial	13.8009	0.93859	20	20
	breadthDistal	10.1226	0.43441	30	30			breadthDistal	13.6228	0.693611	20	20
	breadthBLGroove	9.41082	0.462951	30	30			breadthBLGroove	11.5194	0.837105	20	20
	DistaledgeBuccgroove	1.42398	0.234355	30	30			DistaledgeBuccgroove	1.98067	0.41732	20	20
	ratiohypcnld	0.247364	0.0470642	30	30			ratiohypcnld	0.177534	0.0306485	20	20
	AngleMesial	1.47823	0.0485384	30	30			AngleMesial	1.39722	0.0504793	20	20
	AngleDistal	1.70996	0.0328532	30	30			AngleDistal	1.91941	0.0432055	20	20
	MesialEdgeBuccgroove	2.30178	0.260631	30	30			MesialEdgeBuccgroove	4.00725	0.628218	20	20
Pan paniscus	lengthMD	10.7671	0.521664	20	20		P. t. verus	lengthMD	11.9854	0.483732	10	10
	breadthMesial	8.75278	0.340947	20	20			breadthMesial	10.3583	0.391999	10	10
	breadthDistal	8.50319	0.343647	20	20			breadthDistal	10.2253	0.356807	10	10
	breadthBLGroove	8.10919	0.391376	20	20			breadthBLGroove	9.59466	0.451439	10	10
	DistaledgeBuccgroove	1.16789	0.167278	20	20			DistaledgeBuccgroove	1.29328	0.256714	10	10
	ratiohypcnld	0.2583	0.0374755	20	20			ratiohypcnld	0.19855	0.039398	10	10
	AngleMesial	1.48992	0.0575058	20	20			AngleMesial	1.49161	0.0347776	10	10
	AngleDistal	1.70328	0.049858	20	20			AngleDistal	1.69444	0.0278729	10	10
	MesialEdgeBuccgroove	2.04346	0.257148	20	20			MesialEdgeBuccgroove	2.48665	0.309061	10	10
Homo sapiens	lengthMD	11.4215	0.926908	20	20		P. t. troglodytes	lengthMD	12.3176	0.239192	10	10
	breadthMesial	10.0743	0.683177	20	20			breadthMesial	9.94545	0.640293	10	10
	breadthDistal	10.0653	0.908483	20	20			breadthDistal	9.98735	0.511358	10	10
	breadthBLGroove	9.95566	0.765779	20	20			breadthBLGroove	9.25851	0.559108	10	10
	DistaledgeBuccgroove	1.68318	0.54922	20	20			DistaledgeBuccgroove	1.45901	0.224895	10	10
	ratiohypcnld	0.125842	0.0415157	20	20			ratiohypcnld	0.270282	0.0206582	10	10
	AngleMesial	1.49156	0.0430497	20	20			AngleMesial	1.4389	0.045257	10	10
	AngleDistal	1.62138	0.0643932	20	20			AngleDistal	1.72239	0.0317547	10	10
	MesialEdgeBuccgroove	2.13338	0.380655	20	20			MesialEdgeBuccgroove	2.2566	0.161183	10	10
Total	lengthMD	14.1803	3.57888	110	110		P. t. schweinfurthii	lengthMD	12.737	0.545233	10	10
	breadthMesial	11.5052	2.52589	110	110			breadthMesial	10.2936	0.434411	10	10
	breadthDistal	11.3129	2.39796	110	110			breadthDistal	10.155	0.431347	10	10
	breadthBLGroove	10.2336	1.65851	110	110			breadthBLGroove	9.37931	0.331312	10	10
	DistaledgeBuccgroove	1.64652	0.484449	110	110			DistaledgeBuccgroove	1.51967	0.173131	10	10
	ratiohypcnld	0.20004	0.062756	110	110			ratiohypcnld	0.273261	0.0343821	10	10
	AngleMesial	1.44544	0.0754827	110	110			AngleMesial	1.50418	0.040846	10	10
	AngleDistal	1.77854	0.1392	110	110			AngleDistal	1.71305	0.0352515	10	10
	MesialEdgeBuccgroove	2.91544	1.0728	110	110			MesialEdgeBuccgroove	2.1621	0.188313	10	10
							P. paniscus	lengthMD	10.7671	0.521664	20	20
								breadthMesial	8.75278	0.340947	20	20
								breadthDistal	8.50319	0.343647	20	20
								breadthBLGroove	8.10919	0.391376	20	20
								DistaledgeBuccgroove	1.16789	0.167278	20	20
								ratiohypcnld	0.2583	0.0374755	20	20
								AngleMesial	1.48992	0.0575058	20	20
								AngleDistal	1.70328	0.049858	20	20
								MesialEdgeBuccgroove	2.04346	0.257148	20	20
							H. sapiens	lengthMD	11.4215	0.926908	20	20
								breadthMesial	10.0743	0.683177	20	20
								breadthDistal	10.0653	0.908483	20	20
								breadthBLGroove	9.95566	0.765779	20	20
								DistaledgeBuccgroove	1.68318	0.54922	20	20
								ratiohypcnld	0.125842	0.0415157	20	20
								AngleMesial	1.49156	0.0430497	20	20
								AngleDistal	1.62138	0.0643932	20	20
								MesialEdgeBuccgroove	2.13338	0.380655	20	20
							Total	lengthMD	14.1803	3.57888	110	110
								breadthMesial	11.5052	2.52589	110	110
								breadthDistal	11.3129	2.39796	110	110
								breadthBLGroove	10.2336	1.65851	110	110
								DistaledgeBuccgroove	1.64652	0.484449	110	110
								ratiohypcnld	0.20004	0.062756	110	110
								AngleMesial	1.44544	0.0754827	110	110
								AngleDistal	1.77854	0.1392	110	110
								MesialEdgeBuccgroove	2.91544	1.0728	110	110
