# Supplementary material for: A mathematical landmark-based method for measuring worn molars in hominoid systematics
Source: PeerJ. 2019 May 23;7:e6990. doi: 10.7717/peerj.6990 (PMC6535218; doi:10.7717/peerj.6990)
Supplement: File S3 [file peerj-07-6990-s003.xlsx]

## Sheet: Sheet1
Summary of Canonical Discriminant Functions							Summary of Canonical Discriminant Functions
	Species Level						Subspecies Level
	Eigenvalues						Eigenvalues
	Function	Eigenvalue	% of Variance	Cumulative %	Canonical Correlation		Function	Eigenvalue	% of Variance	Cumulative %	Canonical Correlation
	1	41.399a	91.9148	91.9148	0.988137		1	45.286a	89.6137	89.6137	0.989139
	2	2.982a	6.62138	98.5362	0.865384		2	4.045a	8.00494	97.6186	0.89543
	3	.484a	1.07381	99.61	0.570952		3	.594a	1.17623	98.7948	0.610579
	4	.176a	0.39002	100	0.386548		4	.245a	0.483948	99.2788	0.443289
	a. First 4 canonical discriminant functions were used in the analysis.						5	.189a	0.373572	99.6524	0.398503
							6	.108a	0.212766	99.8651	0.311581
	Wilks' Lambda						7	.068a	0.134882	100	0.252612
	Test of Function(s)	Wilks' Lambda	Chi-square	df	Sig.		a. First 7 canonical discriminant functions were used in the analysis.
	1 through 4	0.00339543	579.903	36	2.57173e-99
	2 through 4	0.143963	197.697	24	2.91659e-29		Wilks' Lambda
	3 through 4	0.573304	56.7467	14	4.32758e-07		Test of Function(s)	Wilks' Lambda	Chi-square	df	Sig.
	4	0.850581	16.5072	6	0.0112754		1 through 7	0.00153446	651.198	63	1.2765e-98
							2 through 7	0.0710241	265.796	48	6.21294e-32
	Standardized Canonical Discriminant Function Coefficients						3 through 7	0.358337	103.141	35	1.22253e-08
		Function					4 through 7	0.571335	56.2578	24	0.000211355
		1	2	3	4		5 through 7	0.711062	34.27	15	0.00312016
	lengthMD	0.388735	-0.0658227	-0.714417	-0.803476		6 through 7	0.8453	16.8904	8	0.0312704
	breadthMesial	0.664538	0.619325	-1.476	-1.02909		7	0.936187	6.62695	3	0.0847883
	breadthDistal	1.35023	0.328519	-1.00237	1.81111
	breadthBLGroove	-1.41359	-1.19754	1.79077	-0.22134		Standardized Canonical Discriminant Function Coefficients
	DistaledgeBuccgroove	-0.558051	-0.447579	1.59094	-0.0187151			Function
	ratiohypcnld	-0.086861	0.805592	-0.050914	0.344599			1	2	3	4	5	6	7
	AngleMesial	-0.349065	0.0764023	1.60708	0.687618		lengthMD	0.48042	-0.190662	-0.812611	0.200266	1.168	-0.288205	-0.740025
	AngleDistal	0.235816	0.141922	1.4245	-0.0263145		breadthMesial	0.452139	-0.87895	-1.38412	0.766552	-1.36668	0.854128	-0.967147
	MesialEdgeBuccgroove	-0.0627706	-0.0303533	1.74876	0.657062		breadthDistal	1.38466	-0.0859943	-0.426749	-1.95504	-0.872642	-0.136204	0.313506
							breadthBLGroove	-1.34215	1.29007	1.29519	0.806359	1.13877	-0.380417	0.989049
							DistaledgeBuccgroove	-0.581139	0.44479	1.27956	0.800659	0.542236	0.70294	0.856841
							ratiohypcnld	-0.0902236	-0.80869	0.00430574	-0.228299	0.0511207	0.0795095	0.295241
							AngleMesial	-0.292986	0.176705	1.72277	-0.268431	0.322927	0.693581	0.0552496
							AngleDistal	0.200265	-0.0540351	1.27316	0.619255	-0.0716932	0.219076	0.63709
							MesialEdgeBuccgroove	0.0197644	0.385247	1.76814	-0.303462	0.224329	-0.320117	0.385296
