# Supplementary material for: A mathematical landmark-based method for measuring worn molars in hominoid systematics
Source: PeerJ. 2019 May 23;7:e6990. doi: 10.7717/peerj.6990 (PMC6535218; doi:10.7717/peerj.6990)
Supplement: File S5 [file peerj-07-6990-s005.xlsx]

## Sheet: Sheet1
Group Statistics - species level					Group Statistics - subspecies level
G. beringei	Mean	Std. Deviation	N		G. b. beringei	Mean	Std. Deviation	N
Mesiodistal length	18.8935	1.13063	20		Mesiodistal length	18.567	0.839538	10
Buccolingual breadth at mesial cusps	15.732	1.07785	20		Buccolingual breadth at mesial cusps	15.48	1.27597	10
Buccolingual breadth at distal cusps	15.4935	0.839017	20		Buccolingual breadth at distal cusps	15.089	0.781202	10
Distance between mesial cusps indexed	0.592997	0.0597366	20		Distance between mesial cusps indexed	0.593343	0.0734061	10
Distance between distal cusps indexed	1.01388	0.080386	20		Distance between distal cusps indexed	1.03223	0.0879567	10
Orientation of hypoconulid in radians	0.940034	0.0918205	20		Orientation of hypoconulid in radians	0.913436	0.0709301	10
Orientation of lingual cusp in radians	1.51194	0.0478472	20		Orientation of lingual cusp in radians	1.52685	0.0594289	10
Orientation of buccal cusp in radians	1.62011	0.0510812	20		Orientation of buccal cusp in radians	1.6119	0.0600255	10
Orientation of cristid obliqua in radians	1.09088	0.144502	20		Orientation of cristid obliqua in radians	1.15853	0.10109	10
G. gorilla					G. b. graueri
Mesiodistal length	16.8436	0.865735	20		Mesiodistal length	19.22	1.3255	10
Buccolingual breadth at mesial cusps	13.8724	1.15522	20		Buccolingual breadth at mesial cusps	15.984	0.826656	10
Buccolingual breadth at distal cusps	14.0724	0.80132	20		Buccolingual breadth at distal cusps	15.898	0.715709	10
Distance between mesial cusps indexed	0.598876	0.0472703	20		Distance between mesial cusps indexed	0.59265	0.0463108	10
Distance between distal cusps indexed	1.07829	0.0610984	20		Distance between distal cusps indexed	0.995532	0.0718149	10
Orientation of hypoconulid in radians	0.871264	0.149769	20		Orientation of hypoconulid in radians	0.966633	0.105809	10
Orientation of lingual cusp in radians	1.55539	0.0519511	20		Orientation of lingual cusp in radians	1.49702	0.0284079	10
Orientation of buccal cusp in radians	1.57471	0.0532507	20		Orientation of buccal cusp in radians	1.62832	0.0418998	10
Orientation of cristid obliqua in radians	1.0532	0.145778	20		Orientation of cristid obliqua in radians	1.02323	0.153925	10
P. troglodytes					G. g. gorilla
Mesiodistal length	11.5254	0.511567	30		Mesiodistal length	16.8436	0.865735	20
Buccolingual breadth at mesial cusps	10.2107	0.576497	30		Buccolingual breadth at mesial cusps	13.8724	1.15522	20
Buccolingual breadth at distal cusps	10.2627	0.414955	30		Buccolingual breadth at distal cusps	14.0724	0.80132	20
Distance between mesial cusps indexed	0.774704	0.0457038	30		Distance between mesial cusps indexed	0.598876	0.0472703	20
Distance between distal cusps indexed	1.04782	0.0829678	30		Distance between distal cusps indexed	1.07829	0.0610984	20
Orientation of hypoconulid in radians	0.743931	0.134555	30		Orientation of hypoconulid in radians	0.871264	0.149769	20
Orientation of lingual cusp in radians	1.54929	0.0588914	30		Orientation of lingual cusp in radians	1.55539	0.0519511	20
Orientation of buccal cusp in radians	1.58726	0.0601015	30		Orientation of buccal cusp in radians	1.57471	0.0532507	20
Orientation of cristid obliqua in radians	1.11669	0.128745	30		Orientation of cristid obliqua in radians	1.0532	0.145778	20
P. paniscus					P. t. verus
Mesiodistal length	10.2301	0.501376	20		Mesiodistal length	11.1851	0.382687	10
Buccolingual breadth at mesial cusps	8.87555	0.382777	20		Buccolingual breadth at mesial cusps	10.445	0.49042	10
Buccolingual breadth at distal cusps	8.7529	0.36226	20		Buccolingual breadth at distal cusps	10.272	0.40612	10
Distance between mesial cusps indexed	0.786501	0.069084	20		Distance between mesial cusps indexed	0.785739	0.0368557	10
Distance between distal cusps indexed	0.997837	0.0721386	20		Distance between distal cusps indexed	0.992714	0.0653441	10
Orientation of hypoconulid in radians	0.668748	0.104177	20		Orientation of hypoconulid in radians	0.621464	0.116943	10
Orientation of lingual cusp in radians	1.55886	0.0579117	20		Orientation of lingual cusp in radians	1.52853	0.0533432	10
Orientation of buccal cusp in radians	1.58203	0.060401	20		Orientation of buccal cusp in radians	1.61073	0.0498665	10
Orientation of cristid obliqua in radians	1.27099	0.168915	20		Orientation of cristid obliqua in radians	1.12752	0.150847	10
H. sapiens					P. t. troglodytes
Mesiodistal length	11.1322	0.87151	20		Mesiodistal length	11.392	0.307961	10
Buccolingual breadth at mesial cusps	10.1338	0.643058	20		Buccolingual breadth at mesial cusps	9.852	0.620229	10
Buccolingual breadth at distal cusps	10.0191	1.01972	20		Buccolingual breadth at distal cusps	10.123	0.388217	10
Distance between mesial cusps indexed	0.573032	0.047445	20		Distance between mesial cusps indexed	0.76302	0.0567644	10
Distance between distal cusps indexed	1.06577	0.13094	20		Distance between distal cusps indexed	1.08136	0.0756814	10
Orientation of hypoconulid in radians	0.802524	0.272931	20		Orientation of hypoconulid in radians	0.834477	0.0758956	10
Orientation of lingual cusp in radians	1.55129	0.0765991	20		Orientation of lingual cusp in radians	1.55568	0.0549004	10
Orientation of buccal cusp in radians	1.58922	0.0818648	20		Orientation of buccal cusp in radians	1.58575	0.0495834	10
Orientation of cristid obliqua in radians	1.32132	0.26406	20		Orientation of cristid obliqua in radians	1.15474	0.0773653	10
Total					P. t. schweinfurthii
Mesiodistal length	13.525	3.47152	110		Mesiodistal length	11.999	0.452019	10
Buccolingual breadth at mesial cusps	11.6236	2.64357	110		Buccolingual breadth at mesial cusps	10.335	0.473926	10
Buccolingual breadth at distal cusps	11.5876	2.61259	110		Buccolingual breadth at distal cusps	10.393	0.445572	10
Distance between mesial cusps indexed	0.675175	0.109607	110		Distance between mesial cusps indexed	0.775353	0.043159	10
Distance between distal cusps indexed	1.04136	0.091441	110		Distance between distal cusps indexed	1.06938	0.0839215	10
Orientation of hypoconulid in radians	0.799721	0.183385	110		Orientation of hypoconulid in radians	0.775851	0.109529	10
Orientation of lingual cusp in radians	1.54571	0.0605562	110		Orientation of lingual cusp in radians	1.56366	0.0675432	10
Orientation of buccal cusp in radians	1.59036	0.0627475	110		Orientation of buccal cusp in radians	1.5653	0.0744543	10
Orientation of cristid obliqua in radians	1.16571	0.198419	110		Orientation of cristid obliqua in radians	1.06779	0.142382	10
					P. paniscus
					Mesiodistal length	10.2301	0.501376	20
					Buccolingual breadth at mesial cusps	8.87555	0.382777	20
					Buccolingual breadth at distal cusps	8.7529	0.36226	20
					Distance between mesial cusps indexed	0.786501	0.069084	20
					Distance between distal cusps indexed	0.997837	0.0721386	20
					Orientation of hypoconulid in radians	0.668748	0.104177	20
					Orientation of lingual cusp in radians	1.55886	0.0579117	20
					Orientation of buccal cusp in radians	1.58203	0.060401	20
					Orientation of cristid obliqua in radians	1.27099	0.168915	20
					H. sapiens
					Mesiodistal length	11.1322	0.87151	20
					Buccolingual breadth at mesial cusps	10.1338	0.643058	20
					Buccolingual breadth at distal cusps	10.0191	1.01972	20
					Distance between mesial cusps indexed	0.573032	0.047445	20
					Distance between distal cusps indexed	1.06577	0.13094	20
					Orientation of hypoconulid in radians	0.802524	0.272931	20
					Orientation of lingual cusp in radians	1.55129	0.0765991	20
					Orientation of buccal cusp in radians	1.58922	0.0818648	20
					Orientation of cristid obliqua in radians	1.32132	0.26406	20
					Total
					Mesiodistal length	13.525	3.47152	110
					Buccolingual breadth at mesial cusps	11.6236	2.64357	110
					Buccolingual breadth at distal cusps	11.5876	2.61259	110
					Distance between mesial cusps indexed	0.675175	0.109607	110
					Distance between distal cusps indexed	1.04136	0.091441	110
					Orientation of hypoconulid in radians	0.799721	0.183385	110
					Orientation of lingual cusp in radians	1.54571	0.0605562	110
					Orientation of buccal cusp in radians	1.59036	0.0627475	110
					Orientation of cristid obliqua in radians	1.16571	0.198419	110
